# Supplementary material for: Single-cell RNA sequencing reveals common interactions between follicle immune cells and granulosa cells in premature ovarian insufficiency patients
Source: PubMed Central journal article supplement (PMC11736418; doi:10.1093/biolre/ioae157), 2024-11-08

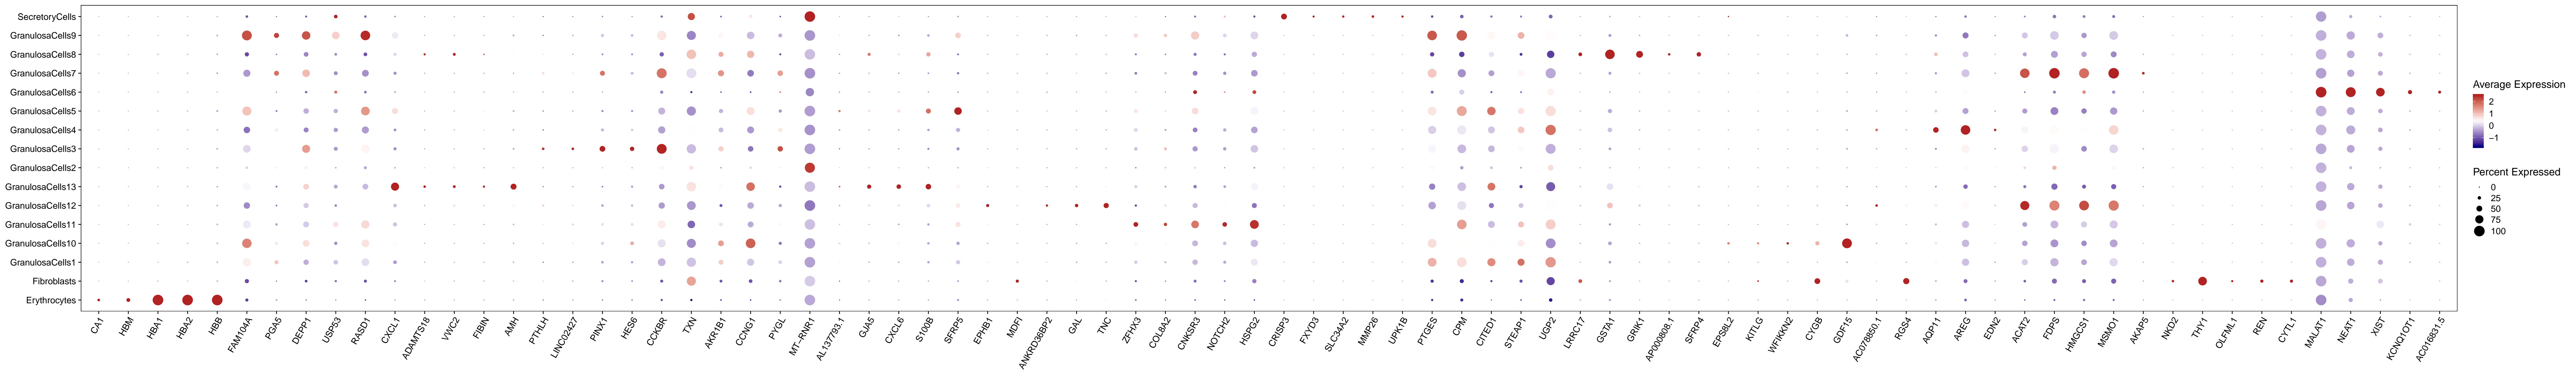

Supplement: supplementary_figure_1_ioae157.pdf [file supplementary_figure_1_ioae157.pdf]
